# Supplementary figures and images for: Resistive switching memory from dielectric lignin for sustainable electronics
Source: Royal Society of Chemistry journal article supplement (doi:10.1039/d4tc02229g), 2024-01-01

# Data and plots

# Figure 1

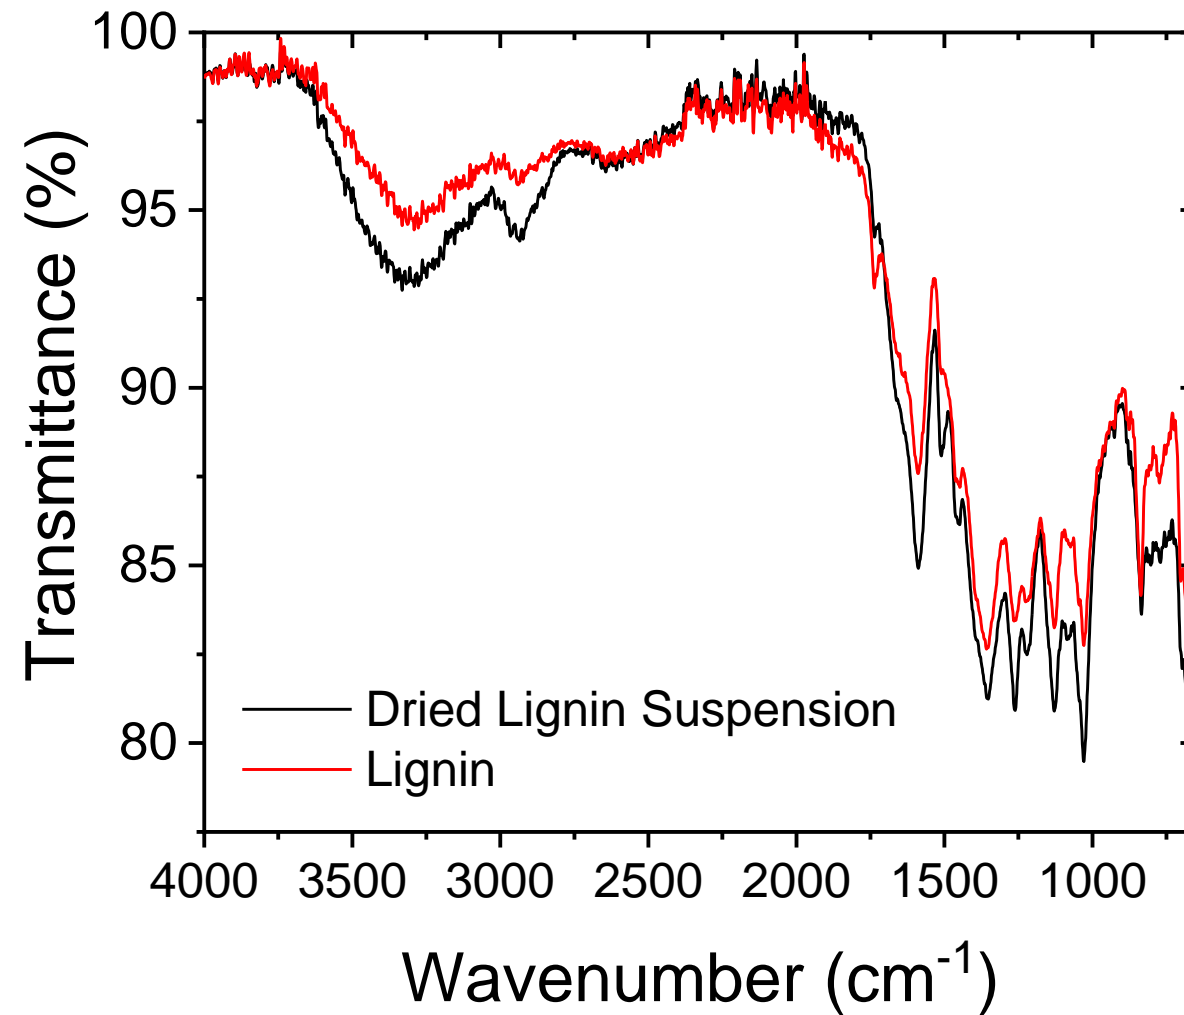

# Figure 2

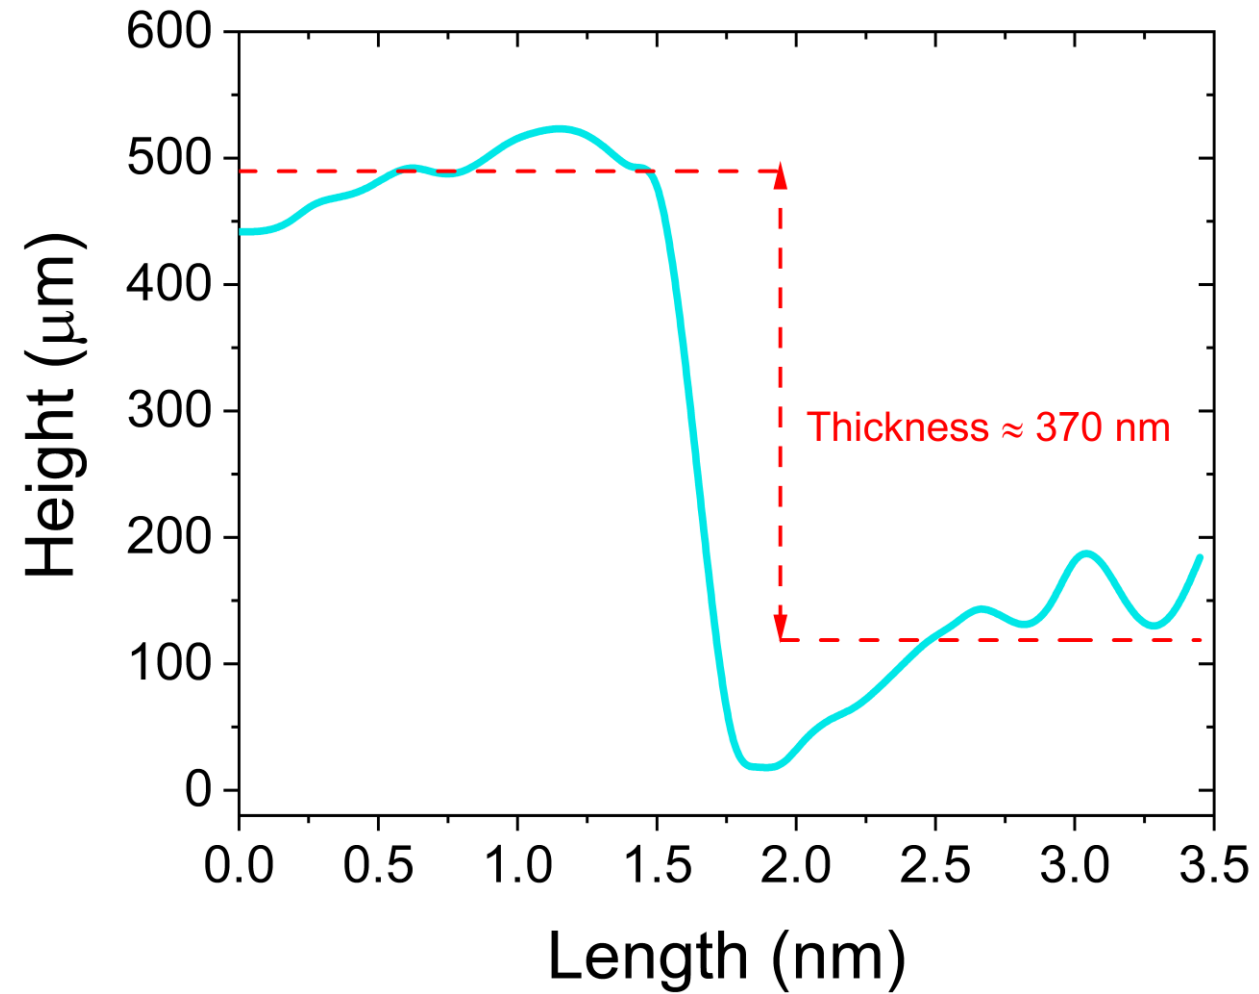

# Figure 3

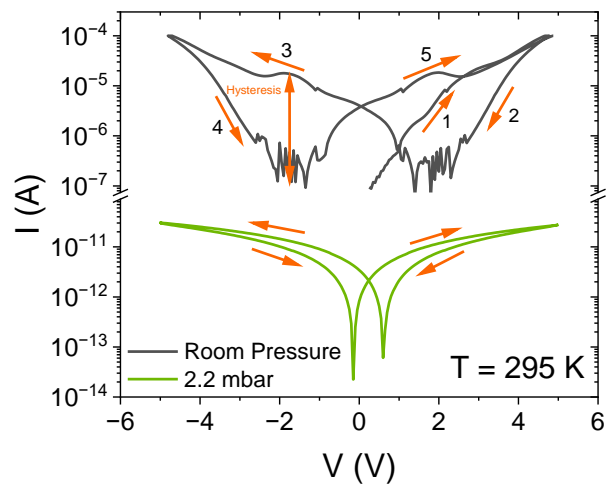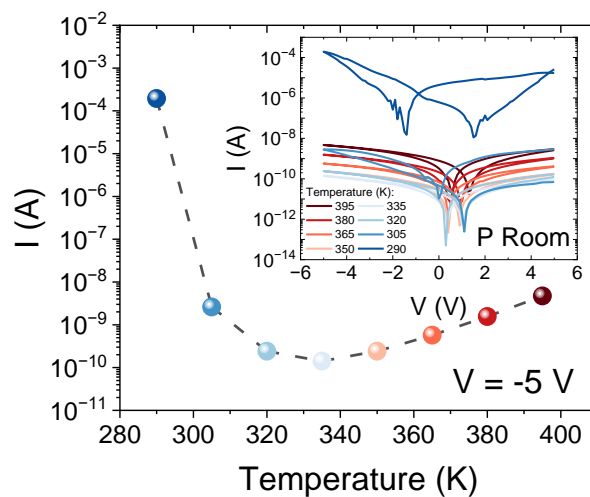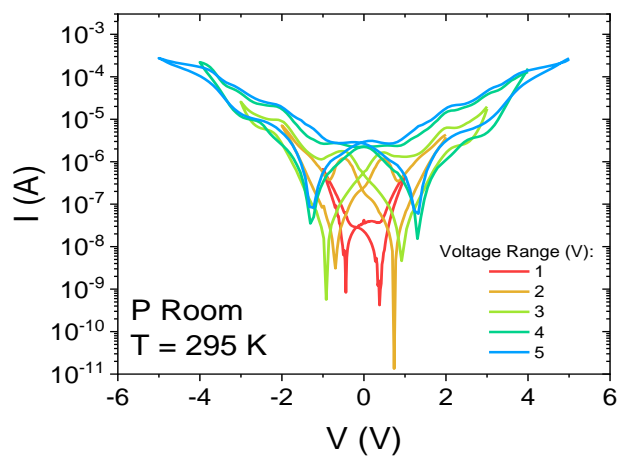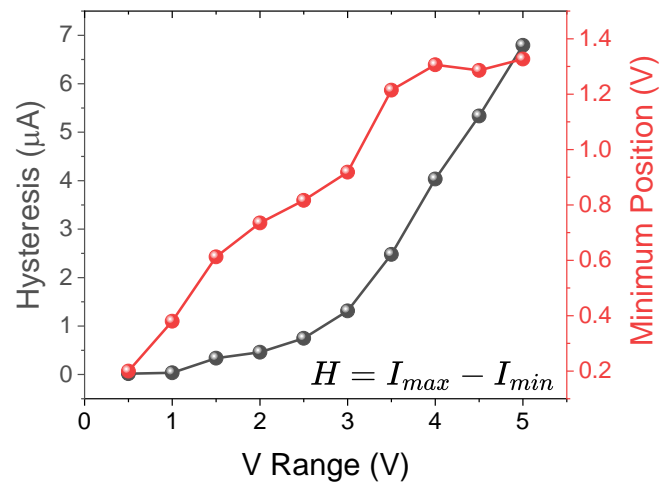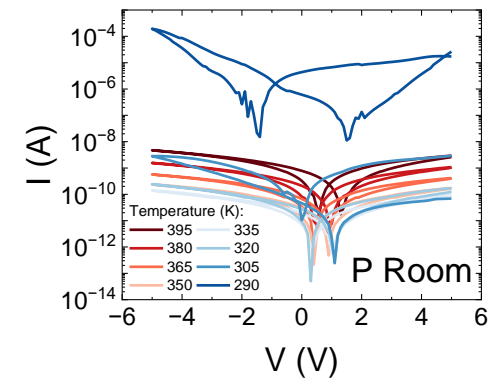

# Figure 4

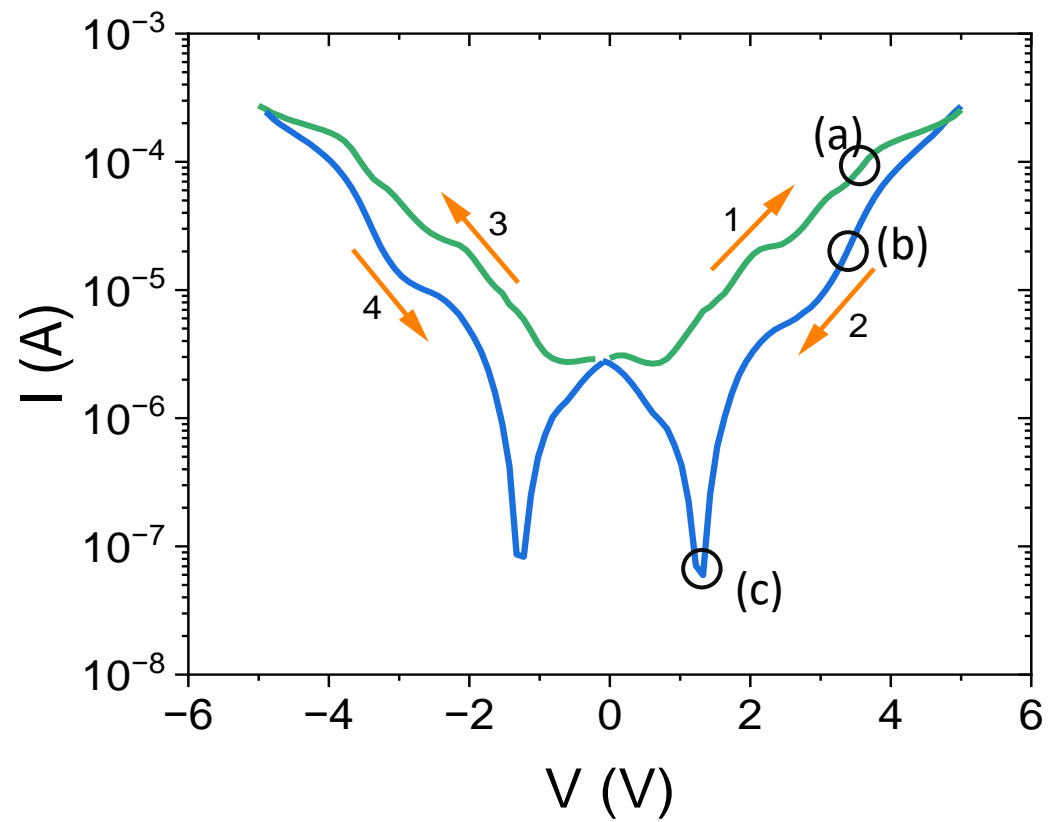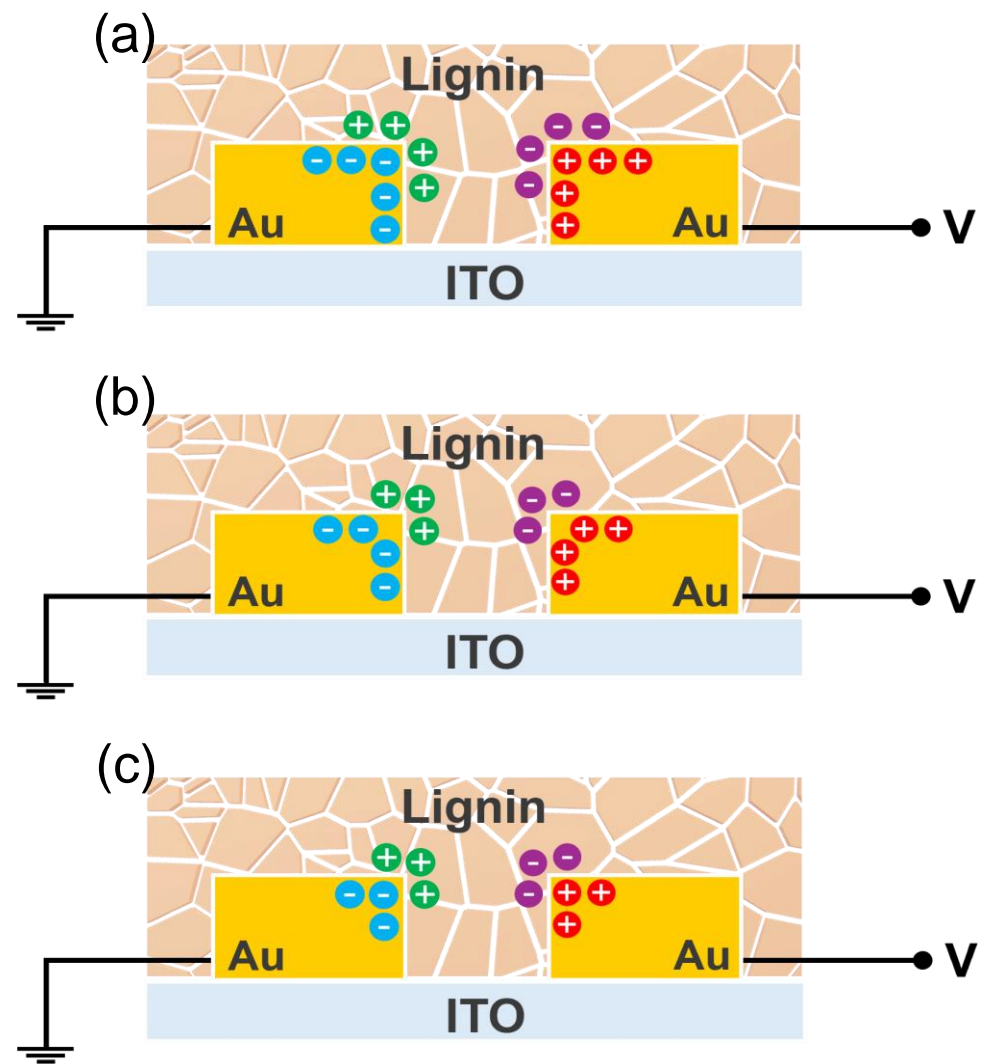

# Figure 5

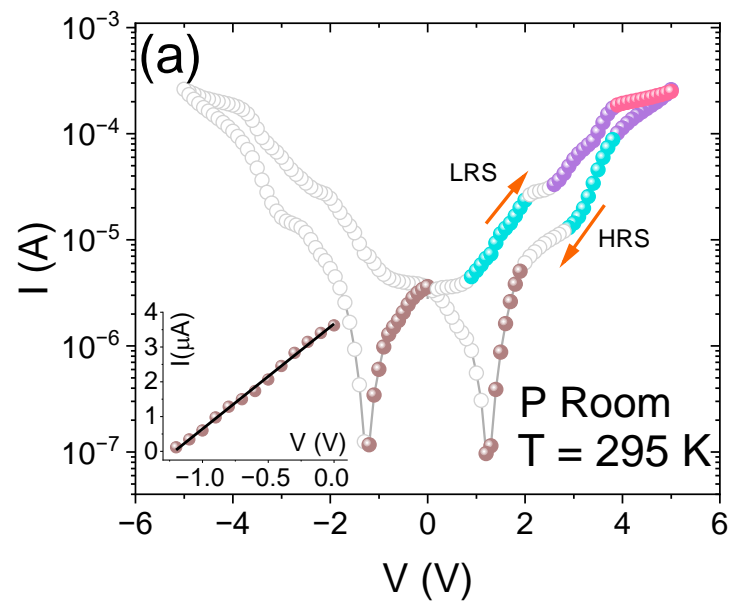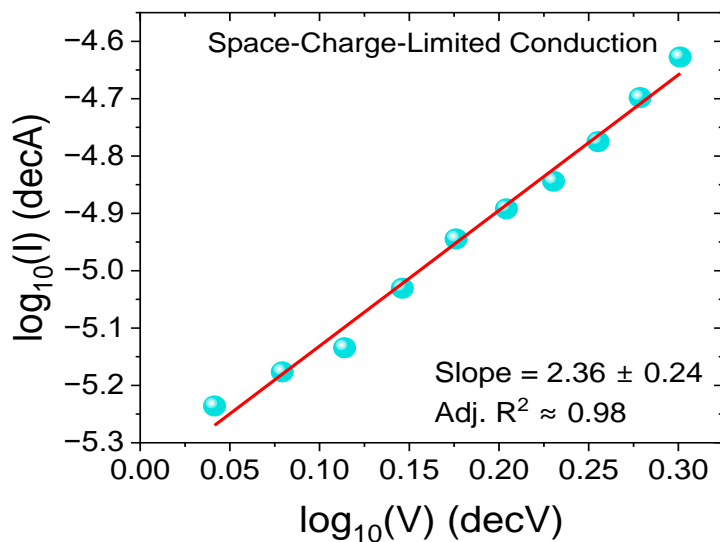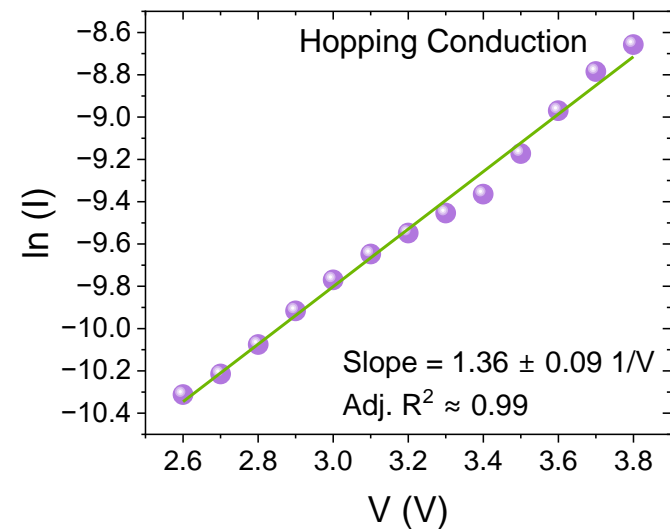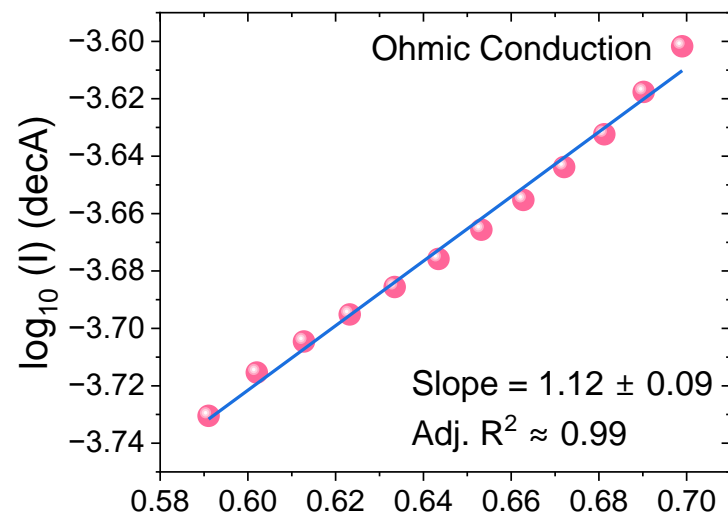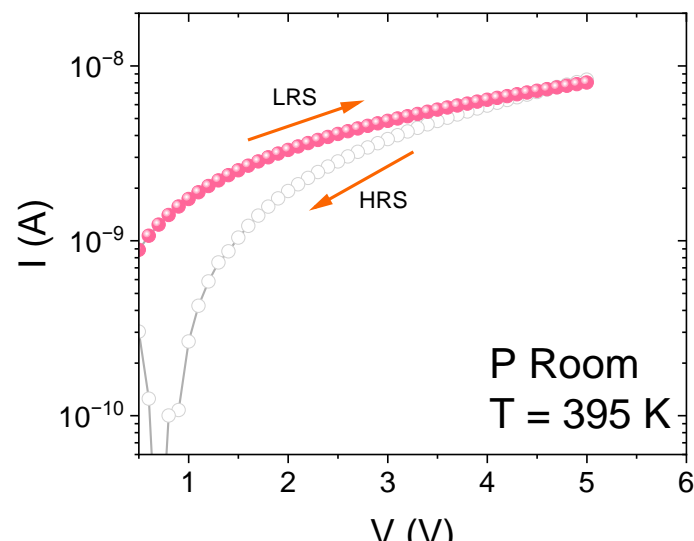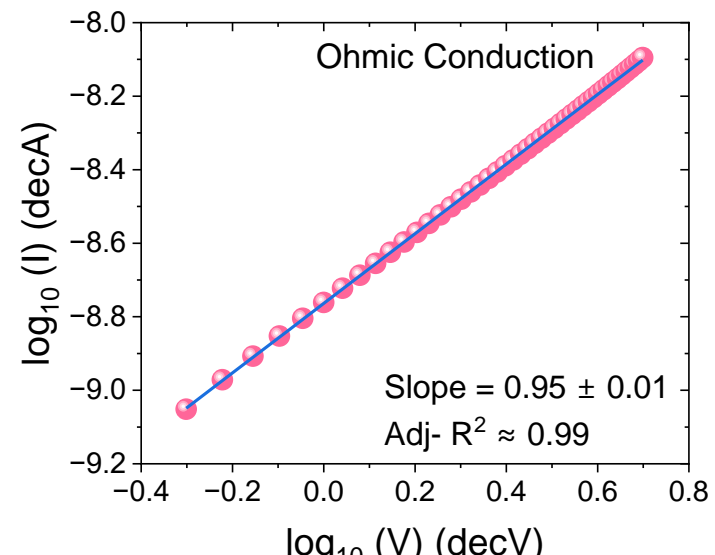

# Figure 6

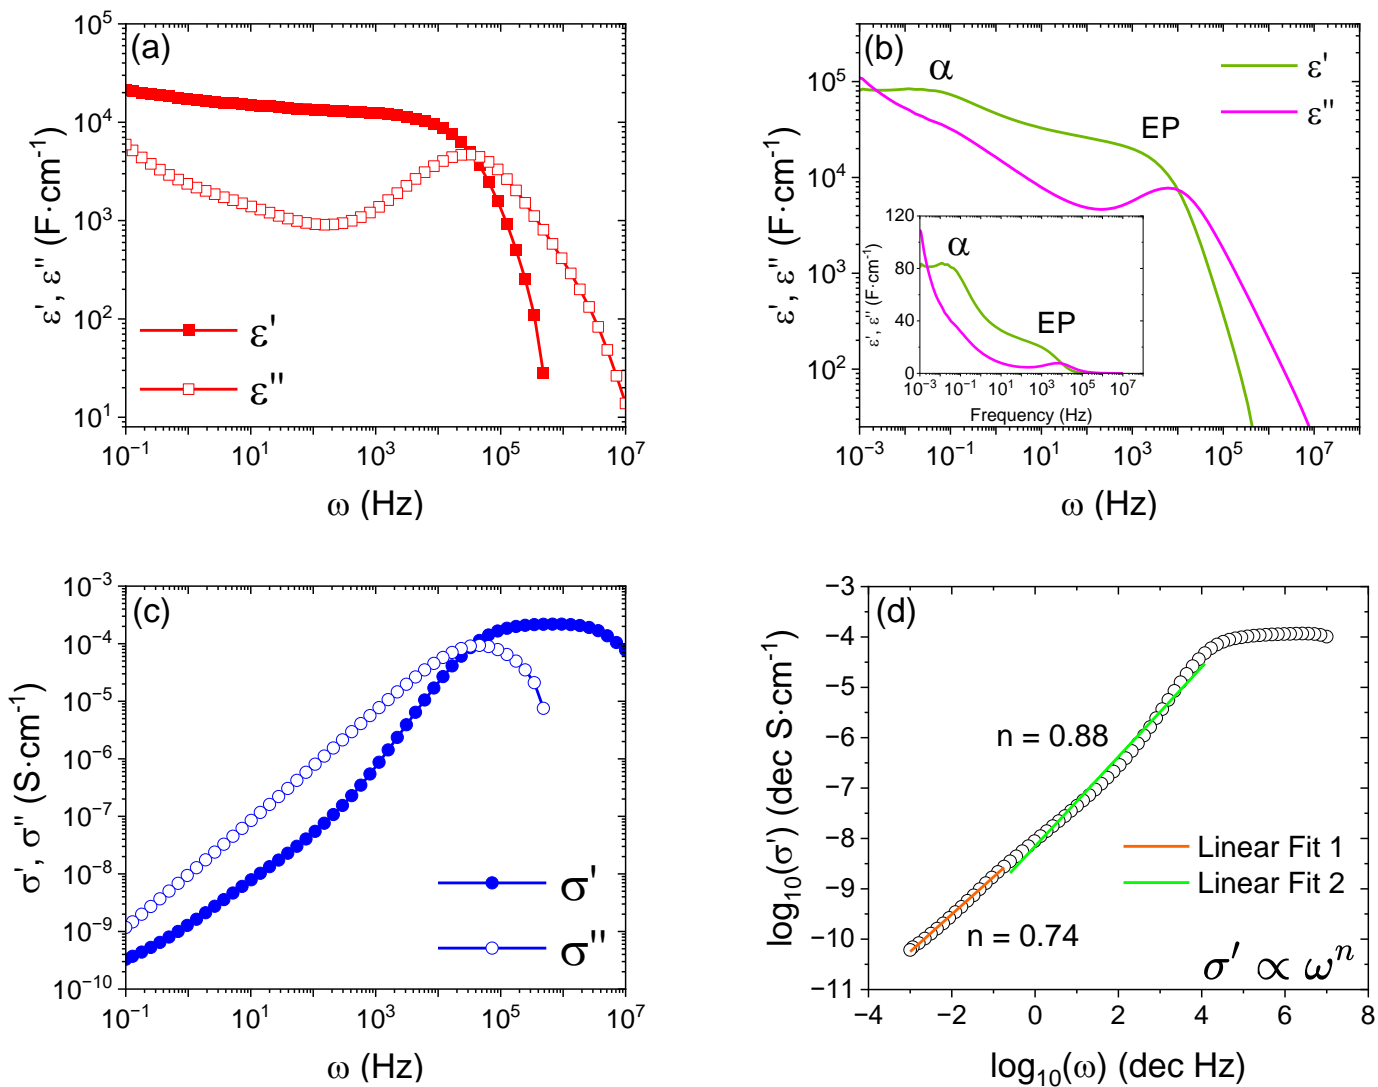

# Figure 7

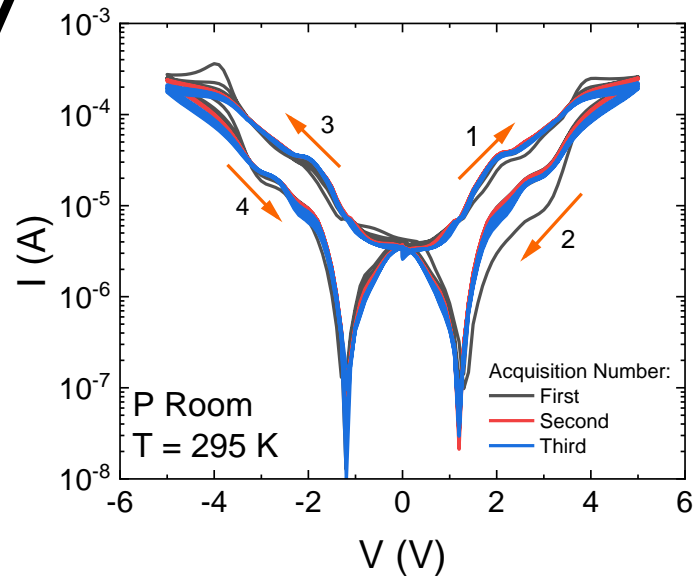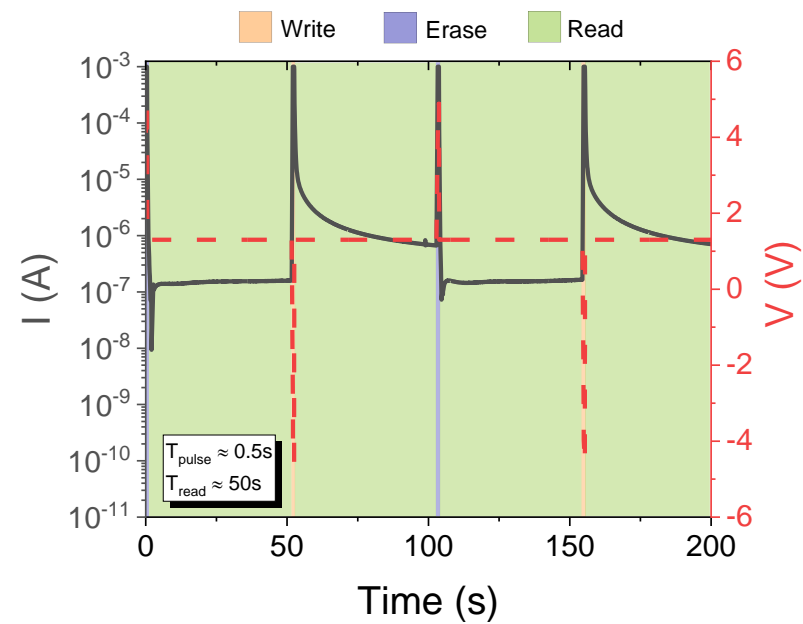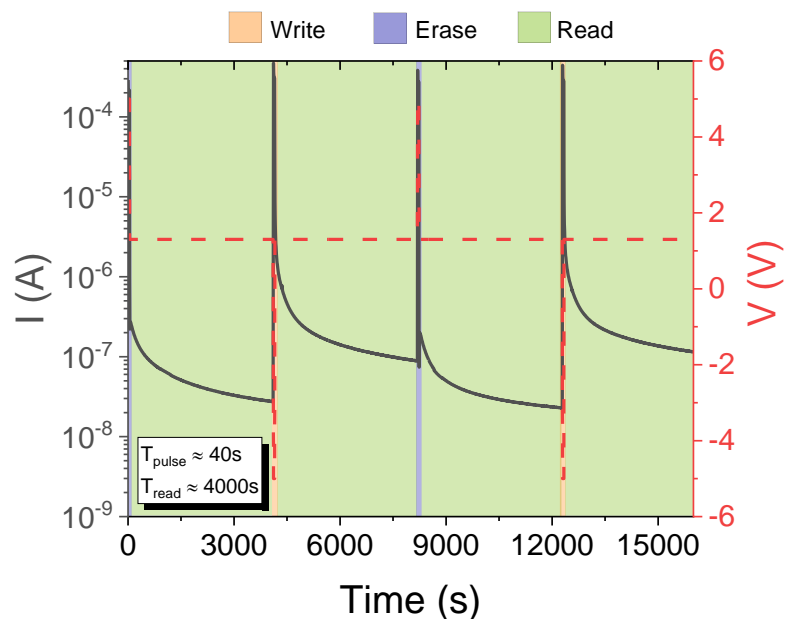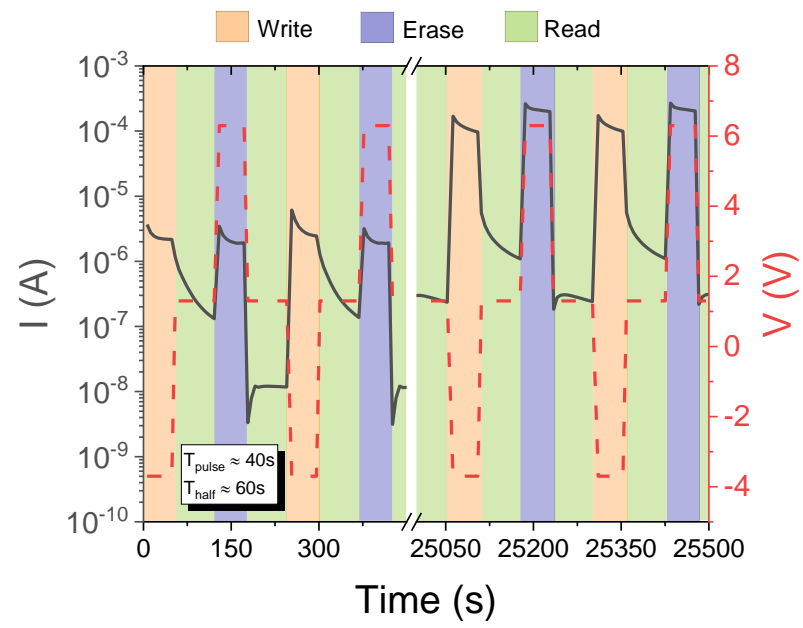

Supplement: d4tc02229g1.pdf [file d4tc02229g1.pdf]
